# Supplementary material for: Significance of arterial spin labeling perfusion and susceptibility weighted imaging changes in patients with transient ischemic attack: a prospective cohort study
Source: Springer Nature journal article supplement (doi:10.1186/s12880-018-0264-6), 2018-08-20

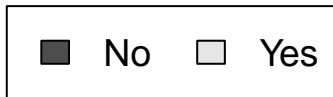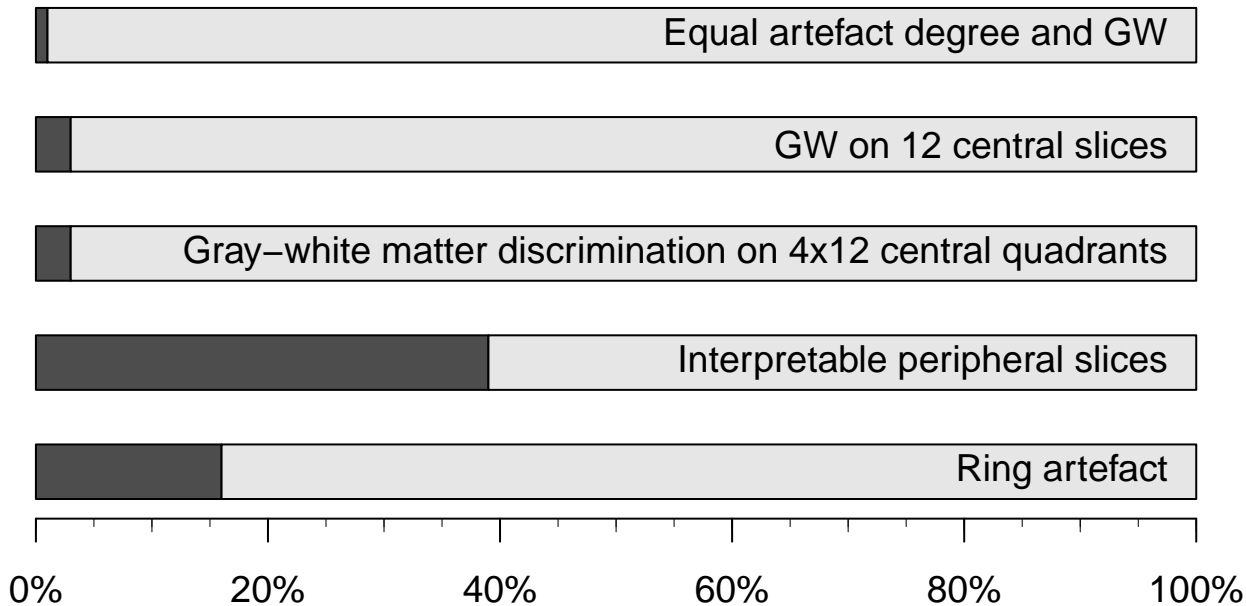

Supplement: MOESM2 [file 16057928]
